# Supplementary material for: Genomic architecture of Shh dependent cochlear morphogenesis
Source: Oxford University Press journal article supplement (doi:10.1242/dev.181339), 2019-01-01
Supplement: dev181339supp.pdf [file dev181339supp.pdf]

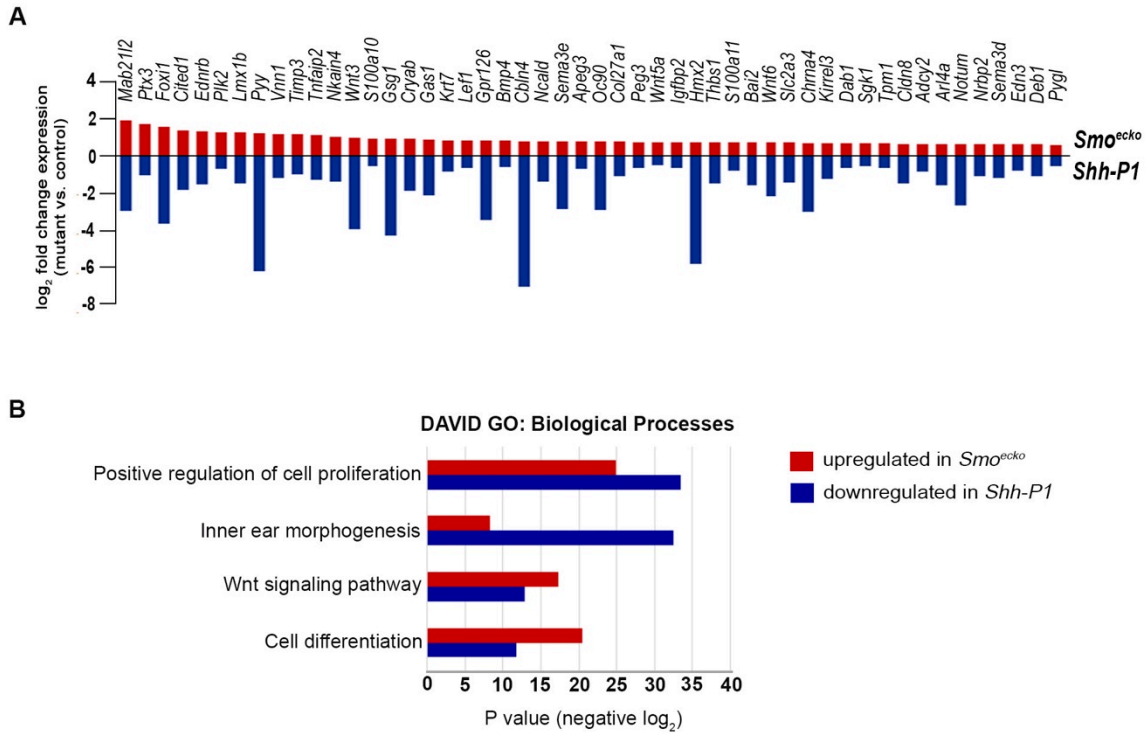

**Figure S1. Differential expression profiling identifies Shh repressed genes in the inner ear.** (A) Top 50 Shh repressed genes that show significant upregulation in *Smo<sup>ecko</sup>* (red) and downregulation in *Shh-P1* (blue) inner ears ( $\log_2$  fold change). (B) DAVID Gene Ontology (Biological Processes) term enrichment for Shh repressed genes.

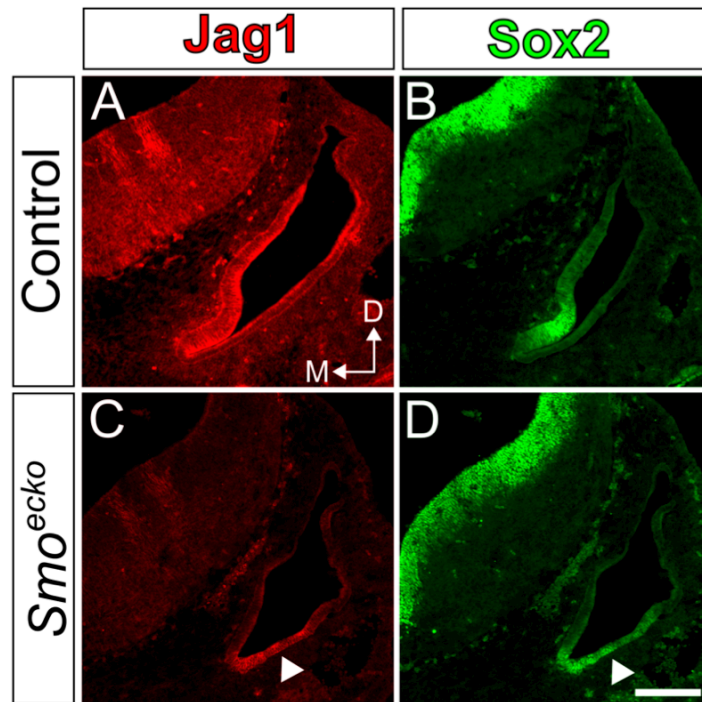

**Figure S2. Misexpression of prosensory markers, Jag1 and Sox2, in *Smo<sup>ecko</sup>* inner ears.** Transverse sections through the otic vesicle of control and *Smo<sup>ecko</sup>* embryos at E11.5 (n=4) immunostained for Jag1 and Sox2. *Smo<sup>ecko</sup>* embryos display a loss of medial and gain of lateral (white arrowhead) otic expression of Jag1 and Sox2.

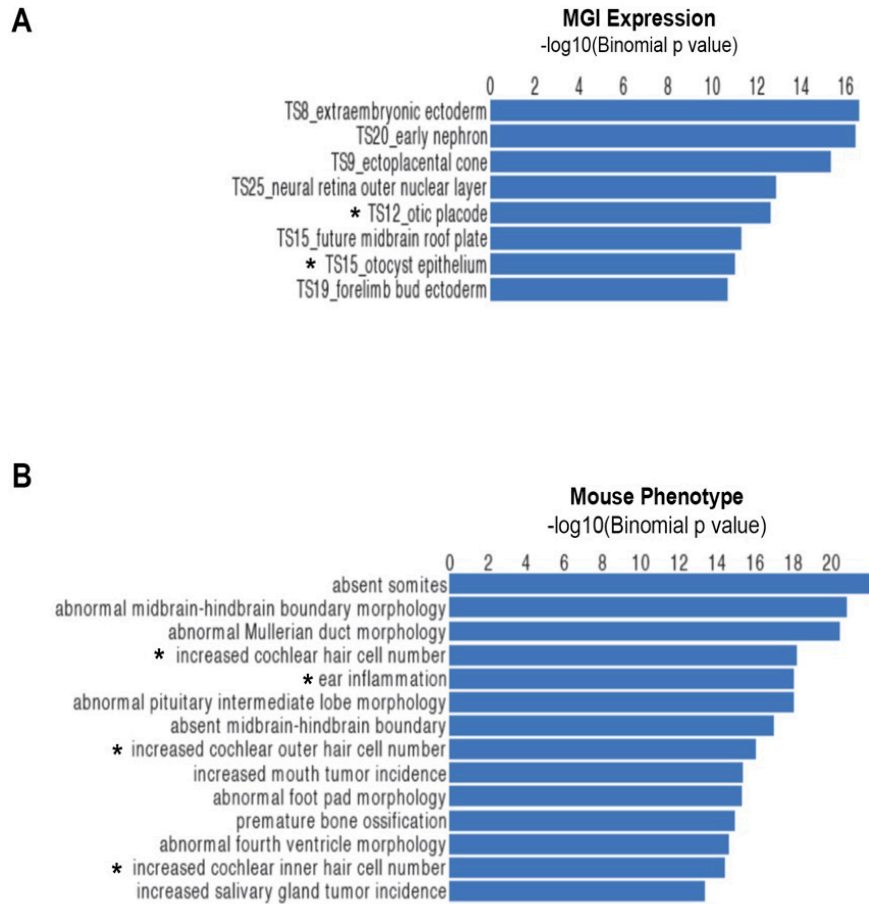

**Figure S3. GREAT based computational analysis of inner ear ATAC-seq sites.** (A, B) Enrichment terms for genes in the vicinity of ATAC-seq peaks based on mouse genome informatics (MGI) expression (A) and phenotypes (B). Significant inner ear enrichment terms are indicated (\*).

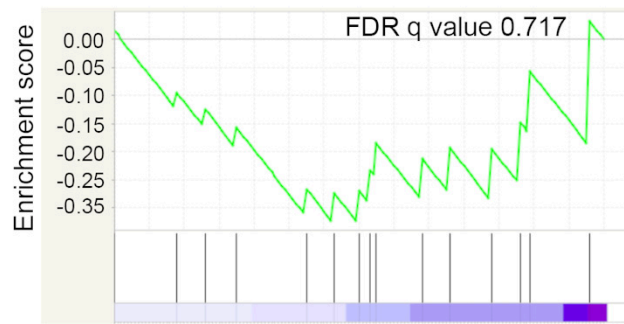

**Figure S4. GSEA analysis of intersected ATAC-seq, Gli2 ChIP-seq and H3K27ac ChIP-seq peaks.** No significant enrichment is detected for intersected peaks in the vicinity of Shh responsive genes (FDR q value =0.717).

Table S1

[Click here to Download Table S1](#)

Table S2

[Click here to Download Table S2](#)

Table S3

[Click here to Download Table S3](#)

Table S4

[Click here to Download Table S4](#)

**Table S5. Primer sequences used in Gli2 ChIP-qPCR and Six1 ChIP-qPCR assays****Gli2 ChIP-qPCR**

| Target sites   | Primer Sequence                                          |
|----------------|----------------------------------------------------------|
| <i>Frem1</i>   | FWD: TGTGCCATGGAAGTCACAAG; REV: TCTTGTCTGAATCTGATGTAGCTC |
| <i>Ecel1</i>   | FWD: CACGTGCGTGTAAGTGATCATA; REV: TCTTGATGGGTGGACGAAAC   |
| <i>Fam107a</i> | FWD: GCAAGACAGCTTCCCTTTGA; REV: TCAGCAGACAGGGTCCTAAA     |
| <i>Hey1</i>    | FWD: CTGCCTGCCTCTGTCTC; REV: GAAACAGCTCCTCCTTCACA        |
| <i>Cldn22</i>  | FWD: CCGAGAGAGAGCTCGGA; REV: CCAGACCCAGGCAAGTT           |
| <i>Jag1</i>    | FWD: TCTGGGTGGCCAGAGTATAA; REV: CCACACATGGACTCTCTGAAC    |
| <i>Pls1</i>    | FWD: CTAAGGCTACACCGTGAACAA; REV: TCATGCCCAGACTTCAACAA    |
| <i>Brip1</i>   | FWD: ACACCACAATACTGGAGATCAA; REV: CTCTCGGGTTGCCAGTAAC    |
| <i>Ptch1</i>   | FWD: CGCCGTAGTACATTACTGAAG; REV: AATGGAAGGGCCGGAAC       |

**Six1 ChIP-qPCR**

| Target sites   | Primer Sequence                                       |
|----------------|-------------------------------------------------------|
| <i>Frem1</i>   | FWD: CATGGAGTCACTCGAATGGAAG; REV: GGTGGTCTGAACAGGGCTT |
| <i>Ecel1</i>   | FWD: TACCAGCCGGGTACACAT; REV: TGTTAGAGTTACCGCGAACAAG  |
| <i>Fam107a</i> | FWD: GAAAGTCCCAGGCCTTGTT; REV: TAACAGGGAGTCTACCACAGT  |
| <i>Hey1</i>    | FWD: TGTGCTGCCCACTTACA; REV: GGAGCACTGGAGATGAGG       |
| <i>Cldn22</i>  | FWD: CCAACTTGCCTGGGTCTG; REV: CAGAGCAGCTTCAGCCTATC    |
